# Supplementary material for: HLA-DRB1 May Be Antagonistically Regulated by the Coordinately Evolved Promoter and 3′-UTR under Stabilizing Selection
Source: PLoS One. 2011 Oct 18;6(10):e25794. doi: 10.1371/journal.pone.0025794 (PMC3196528; doi:10.1371/journal.pone.0025794)
Supplement: Table S2 — All primer sequences involved in this paper. (XLS) [file pone.0025794.s008.xls]

## Sheet: Sheet1
Table S2 All primer sequences involved in this paper
PCR primers		Sequencing primers
designations	sequences(5'-3')	Designations	sequences(5'-3')
UP01F	ATGCTGGAGAACAGGACAGGACC	U1ST1	TGGAGAACAGGACAGGACC
UP01R	GCTTGGACAAGTGGCAGACATTC	U1S01	AAAGGAGATGGAGGGAAC
H1ASP1R	AAGTGAGCCCCATTCTGTGAAAAC	U1S02	GCAATGGAGAGTCCGAAG
H21ASP1R	CTGAGTTGAGAGGATTATTCTCTTTTTTC	U1S03	TGGGAGGTGGAGGTTGC
H22ASP1R	CCAATGTCAACCTGCCTGTTGC	U1S04	GCTGAGTGAGGGAAATACC
H3ASP1R	CTGCCTGTTGTTCAGCAAAAGTCTC	U1S05	CTTTAATTCATGGCTGTGC
H4ASP1R	TTCATCAAGACCAGAGACCATGC	U1S06	ATTGTCCCTGGATTTGAGA
miR214F1	ccc aagctt TAAAGTCAAAAGTCTAAC	U1S07	GGTTCAATGTCTGGCAAAG
miR214R1	ccg gaattc ATAGGCACCACTCACTT	U1S2.1	GCAATGGAGGGTCTGAAG
LAC1F	GAAACGCTGGTGAAAGTAAAAGA	U1S2.3	GAGCCACGTGGAACAGAG
LAC1R	AAGTGCTCATCATTGGAAAACG	U1S3.1R	GATTTTCCCTAGGGTTCTG
LUC1F	GAGATACGCCCTGGTTCCTG	HapT2S1	CTCACAGTTGAAATGAAGGC
LUC1R	GCGAAATGCCCATACTGTTG	HapT2S2	GTTCAATCCCTCATTCCTG
PP1F	ccc AAGCTT TGAGGCATCCACAGAATC	HapT2S3R	CATTTGTTTGAGGCTATGG
PP1R	AGTCTCACTCAGGGAGAACTATGA	HapT2S4	CCAAAGTGCTGGGATTACA
PU1F	CTCCCTGAGTGAGACTTGCCTGC	HAPT2S4.1	TCATCCCTACAAGTGAAGAGA
PU1R	catg CCATGG GCTGGAGAACAGGACAGG	HapT22S5	GCCTCAACATTCATAACTCC
PU2F*	ccc aagctt TCATAGTTCTCCCTGAGTGAG	HapT2S6R	ACACCTCTCACAGCCAGC
kpnI-PF3	gg ggtaccc TGAGGCATCCACAGAATC	H3S5	CTAATACGTTACAGAATGTTCATG
smaI-PR3	tcc cccggg GCTGGAGAACAGGACAGG	H3NS01	GGTAGGCCTCTGAAATGAC
PWUR12-smaI	tcc cccggg TGAACCCCTCCACCCAC	H3NS02R	CTGATGTAATTCATAGATTTTCC
PWUR34-smaI	tcc cccggg TGACCCCTCTCCACCCAC	H4NS03	GGATGAAATAAACCCCAGTC
UR-E2F	AGGACCTTCATACAGCATCTCTGAC	H4NS04R	GGGAATCTTTTGAAGGAAC
EJ1R	GATTCTAAATGCTCACAGATGGCG	H3S3	TACTCTGTCCCTTTATTTCTCA
DRBF1	CTAAAGCTTAGCGGAGTGGAGAGGTCTG	H3S4R	GGGAATCTTTTGAAGGAACTA
DRBR1	ACCGGATCCTTCCCTTCCTTGCATCTCTAA	H2S3F	GTTGATGCGGCGAGACT
E2-DU1F	CTA AAG CTT CACAAGGTCATCACTAAGG	H2S4R	TGCATAGTTATACTTTGAAGTCC
E2-DU1R	ACC GGA TCC AGAGTTCTGATTGACTTGCT	H4S3-4R	CTAAGGCACACAAGGAAGG
UTH1F	TCAGGGGAGACTCAGGAACTTC	3'UCRS01	TATAGGCATATATCAAAACTTCAT
UTH1R	GTTCTGAACCCTTGAACACATATCTA	3'UCRS1202	CCACTGTCAGAGACGACTG
DU-DR01F	TCAGGGGAGACTCAGGAACTTG	3'UCRS12.1R	TCATAAAATAACATGTCAGCATA
UTH2F	GAGAGGAAAAGAAACTGTTAGTAGAGT	3'UCRS3402	CATACATACCAGGTGTGTAAAGG
UTH2R	GGATGTAGTTGAATTTTGTTTATCTG	3'UCRS34.1R	GCCACTGTATTTCAGTCTGG
UTH3F	TGCAGTGCTCTCATCTGAGTCT
UTH4F	GTCTGAAAACAACACTTTCTTGC
UTH34R	CCATTTACTAATTGAAGGATATTTGT
